# Supplementary material for: PRDX4 overexpression is associated with poor prognosis in gastric cancer
Source: PubMed Central journal article supplement — Oncol Lett. 2020 Mar 19;19(5):3522–30. doi: 10.3892/ol.2020.11468 (PMC7114939; doi:10.3892/ol.2020.11468), 2020-03-19
Supplement: Supplementary_Data.pdf [file Supplementary_Data.pdf]

Table SI. Clinicopathological data of the patients in the tissue microarray experiment.

| Pathologic variables                | Number of patients |
|-------------------------------------|--------------------|
| WHO classification                  |                    |
| WD/MD/PD/Mucinous/SRC               | 68/118/108/9/29    |
| Lauren Classification               |                    |
| Intestinal/Diffuse/Mixed            | 182/63/11          |
| Tumor size and T stages             |                    |
| Mean tumor size, cm                 | 4.4±2.7            |
| T1/T2/T3/T4                         | 164/38/98/38       |
| Lymph node metastasis               |                    |
| Mean involved LN                    | 2.3±5.5            |
| N0/N1/N2/N3                         | 206/39/42/51       |
| Metastasis                          |                    |
| M0/M1                               | 336/2              |
| TNM stages                          |                    |
| Stage I/Stage II/Stage III/Stage IV | 186/60/90/2        |
| PRDX4 expression status             |                    |
| 0/1/2/3                             | 14/152/143/29      |

WHO, World Health Organization; WD, well differentiated; MD, moderately differentiated; PD, poorly differentiated; SRC, signet ring cell carcinoma; LN, lymph node; PRDX4, peroxiredoxin 4.
